# Supplementary material for: Fabrication of Human Keratinocyte Cell Clusters for Skin Graft Applications by Templating Water-in-Water Pickering Emulsions
Source: Biomimetics (Basel). 2019 Jul 11;4(3):50. doi: 10.3390/biomimetics4030050 (PMC6784416; doi:10.3390/biomimetics4030050)
Supplement: Supplementary file 1 [file biomimetics-04-00050-s001.pdf]

**Supplementary Information for:**

**Fabrication of human keratinocyte cell clusters  
for skin graft applications by templating water-  
in-water Pickering emulsions**

**Sevde B.G. Celik,<sup>a</sup> Sebastien R. Dominici,<sup>a</sup> Benjamin W. Filby,<sup>a</sup>  
Anupam A.K. Das,<sup>a</sup> Leigh A. Madden<sup>b</sup> and Vesselin N. Paunov<sup>a\*</sup>**

*<sup>a</sup> Department of Chemistry and Biochemistry,*

*<sup>b</sup> Department of Biomedical Science University of Hull, Hull, HU67RX, UK.*

*\*Corresponding author: Email: [V.N.Paunov@hull.ac.uk](mailto:V.N.Paunov@hull.ac.uk)*

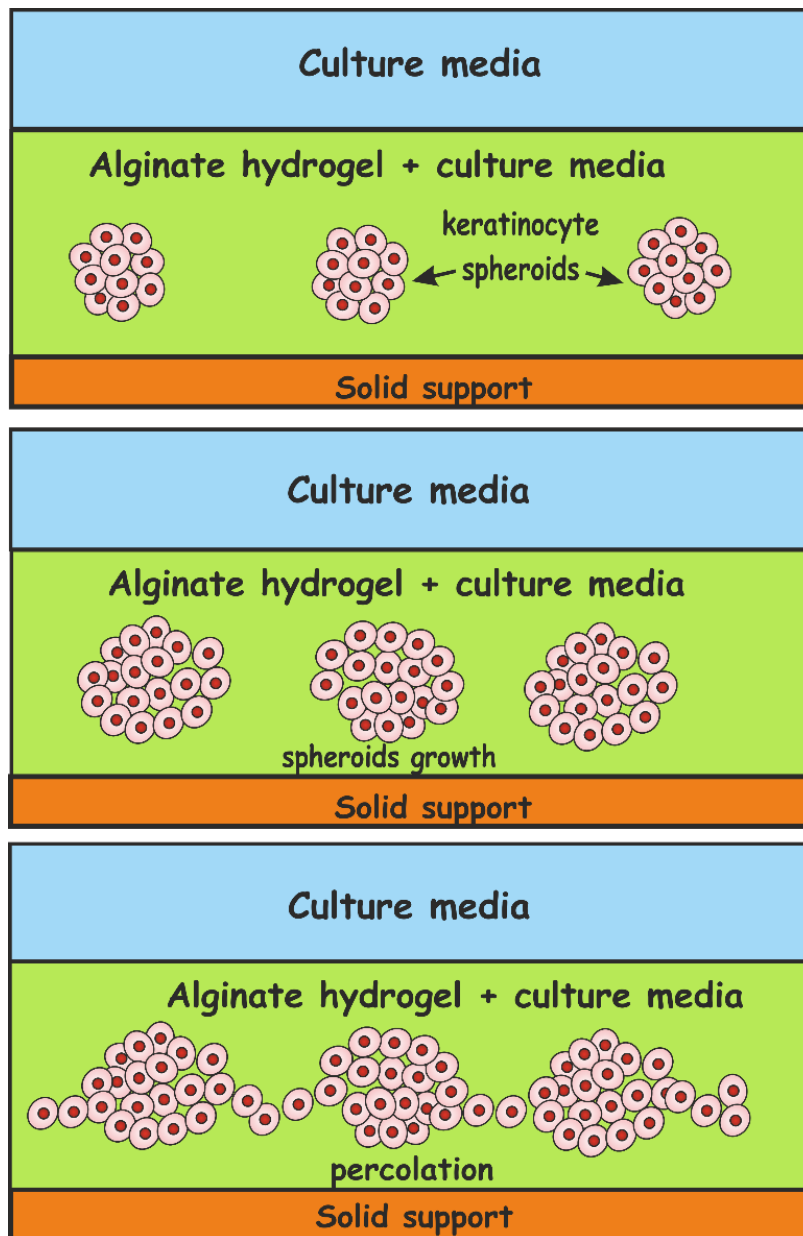

**Figure S1.** Schematics of the formulation of keratinocyte clusteroids in cross-linked alginate films and the evolution of their growth.

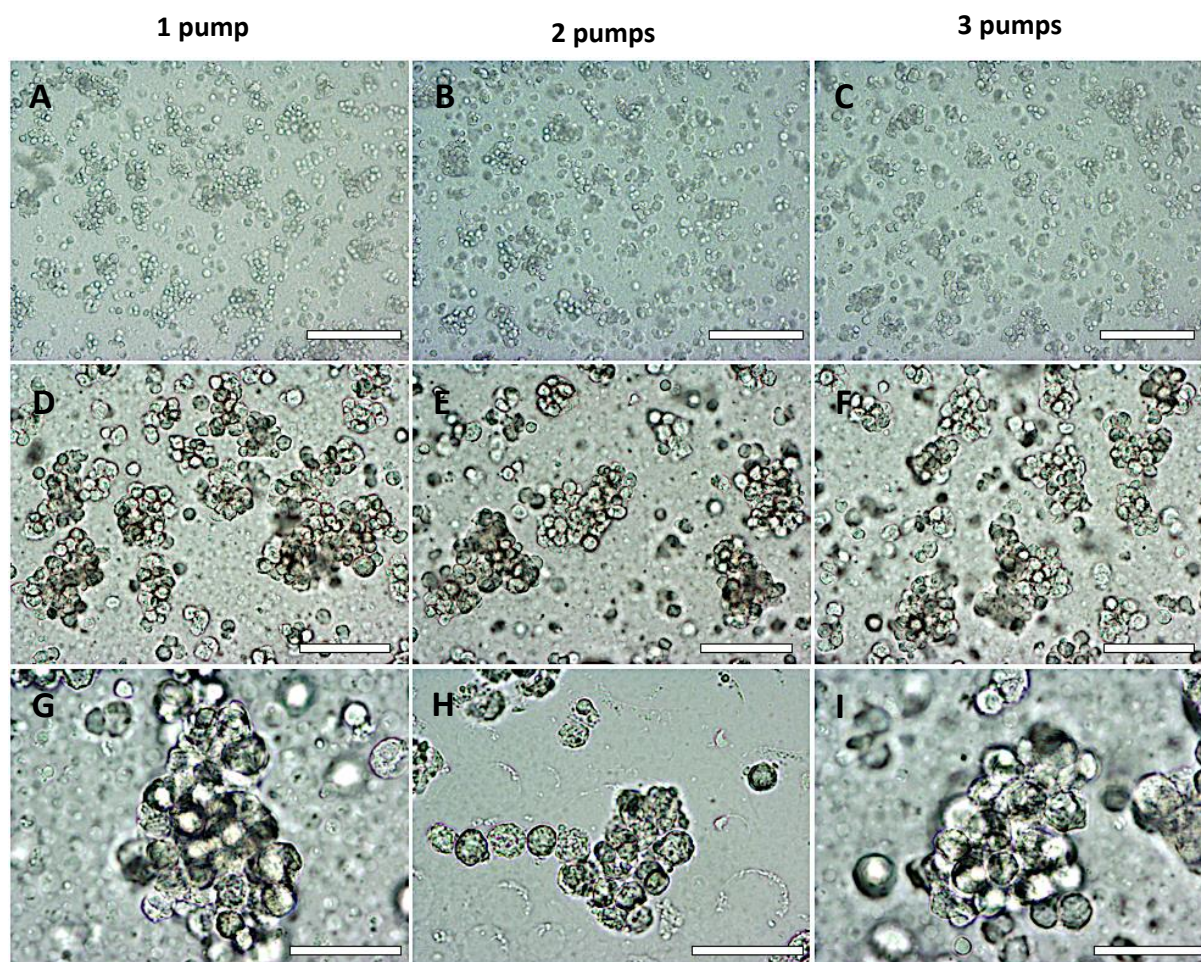

**Figure S2.** Optical microscopy images of HaCaT cell droplets (PEO 5.5 wt%/DEX 5.5 wt%) stabilized by 2wt% WP particles, at different stage of homogenization: (A, D, G) 1 pump, (B, E, H) 2 pumps and (C, F, I) 3 pumps. Scale bars are (A to C) 200 μm, (D to F) 100 μm and (G to I) 50 μm.

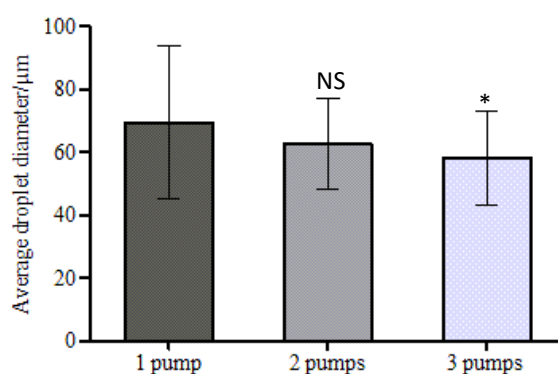

**Figure S3.** Average DEX droplet diameter for the formulation of WP/NaCl 300mM solution at pH 5.8, PEO 5.5 wt%/DEX 5.5 wt% homogenized by 1, 2 or 3 pumps. The data were obtained by optical microscopy measurements of the emulsion droplets for each micrograph with ImageJ Software. (Student's t-Test, NS: non-significant, \*: P < 0.05)

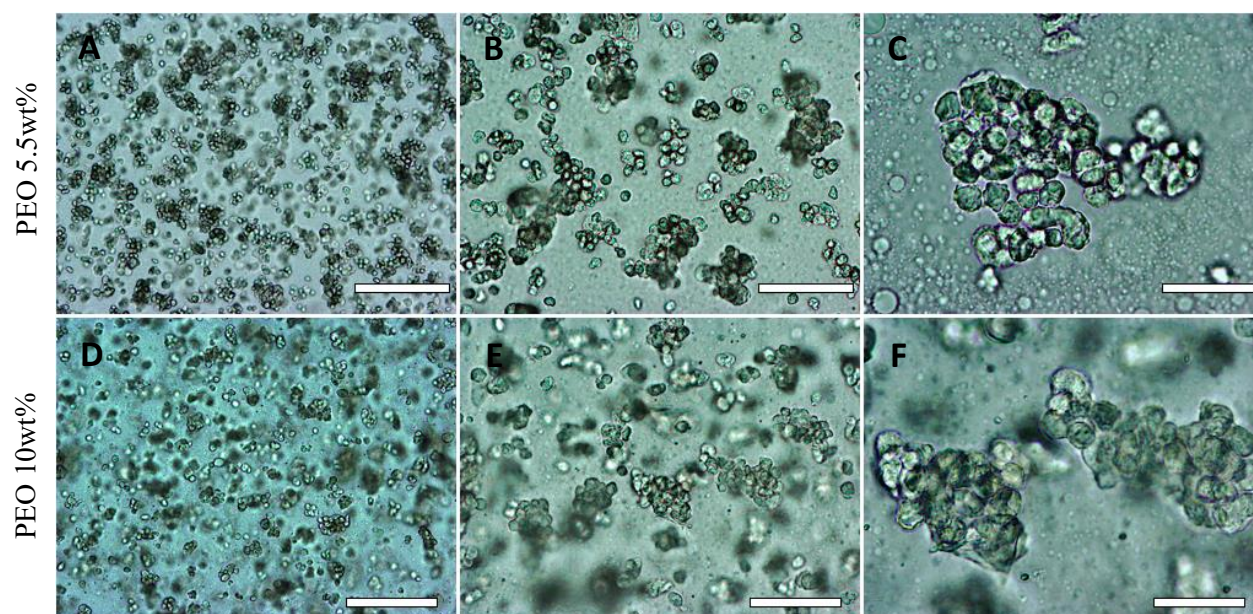

**Figure S4.** Optical microscopy images of (A to C) HaCaT cell ( $\phi = 0.2$ ) droplets (PEO 5.5 wt%/DEX 5.5 wt%) and (D to F) HaCaT cell spheroids (PEO 10 wt%/DEX 5.5 wt%) stabilized by 2wt% WP particles. Scale bars are (A, D) 200  $\mu\text{m}$ , (B, E) 100  $\mu\text{m}$  and (C, F) 50  $\mu\text{m}$ .

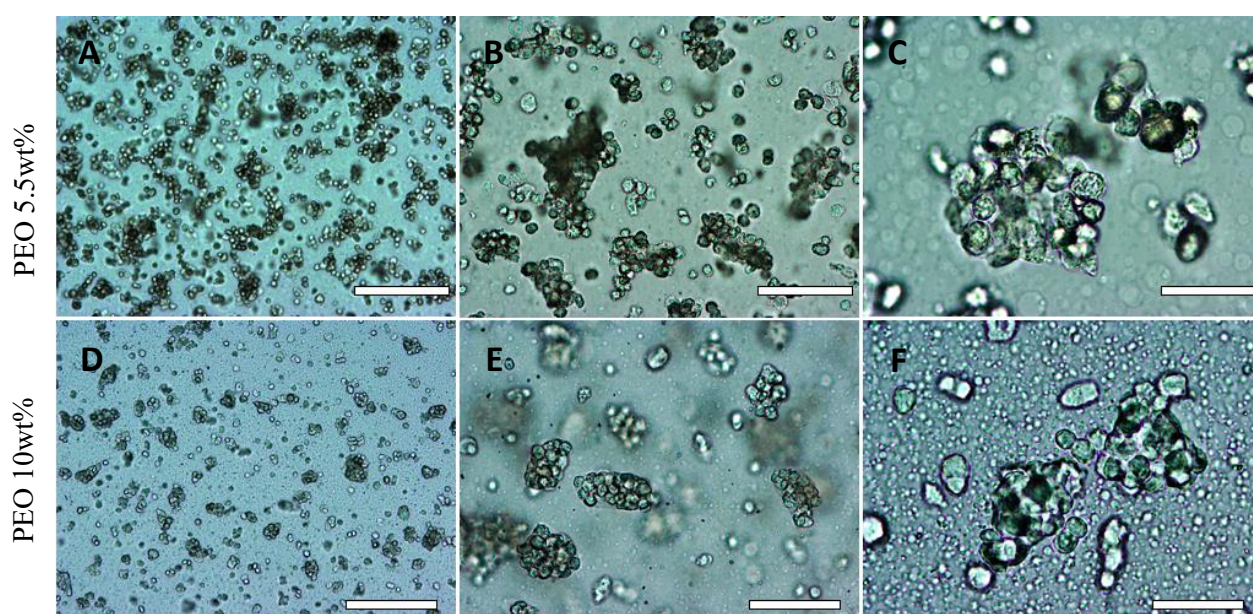

**Figure S5.** Optical microscopy images of (A to C) HaCaT cell ( $\phi = 0.25$ ) droplets (PEO 5.5 wt%/DEX 5.5 wt%) and (D to F) HaCaT cell spheroids (PEO 10 wt%/DEX 5.5 wt%) stabilized by 2wt% WP particles. Scale bars are (A, D) 200  $\mu\text{m}$ , (B, E) 100  $\mu\text{m}$  and (C, F) 50  $\mu\text{m}$ .

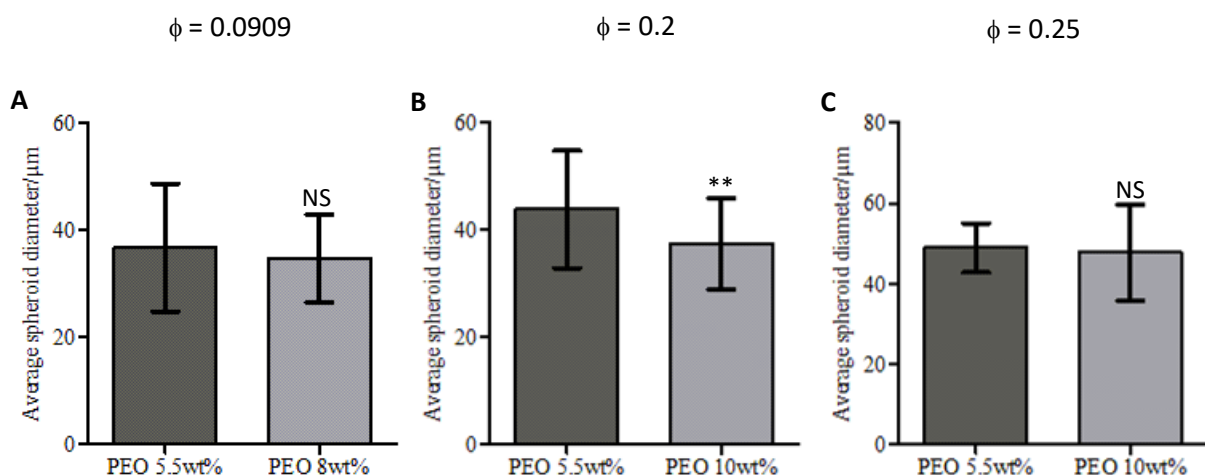

**Figure S6.** Average HaCaT spheroid diameter for emulsions (A) PEO 5.5wt or PEO 8wt%  $\phi_{\text{HaCaT}} = 0.0909$ , (B) PEO 5.5 wt% or PEO 10 wt%  $\phi_{\text{HaCaT}} = 0.2$  and (C) PEO 5.5 wt% or PEO 10wt%  $\phi_{\text{HaCaT}} = 0.25$ . Data were obtained by optical microscopy measurements of droplets for each micrograph with ImageJ Software. (Student's t-Test, NS: non-significant, \*\*: P < 0.01).

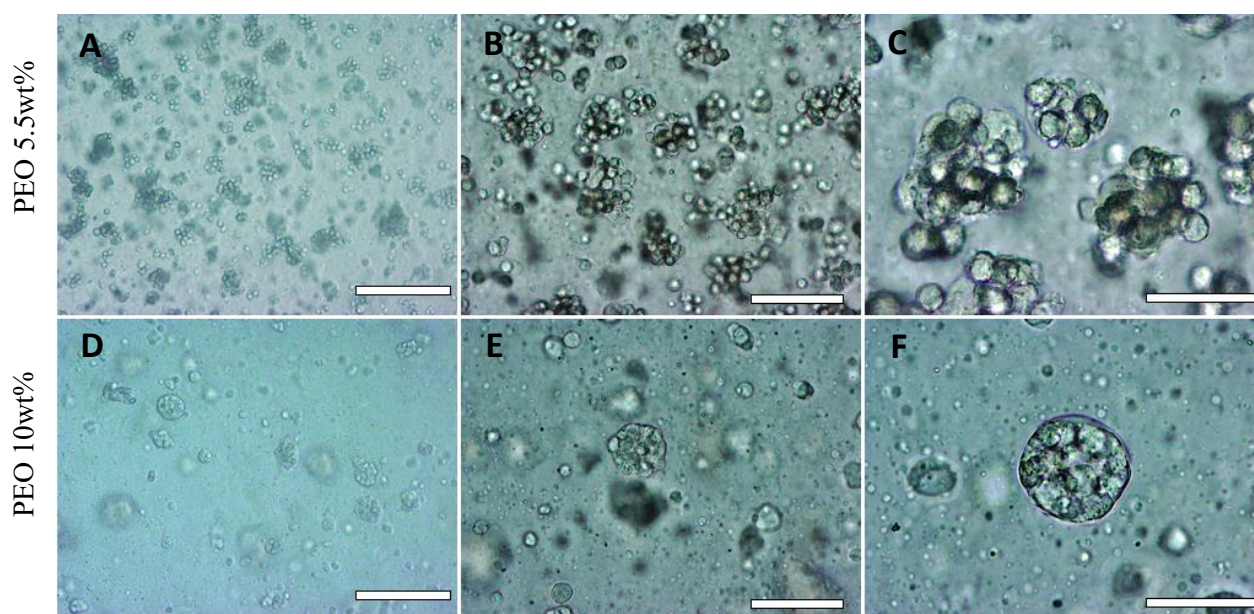

**Figure S7.** Optical microscopy images of (A to C) HaCaT cell droplets (PEO 5.5 wt%/DEX 5.5 wt%) and (D to F) HaCaT cell spheroids (PEO 10 wt%/DEX 5.5 wt%) stabilized by 2 wt% WP particles.  $\phi_{\text{HaCaT}} = 0.25$  and  $\phi_{\text{Dex}} = 0.2$ . Scale bars are (A, D) 200 μm, (B, E) 100 μm and (C, F) 50 μm.

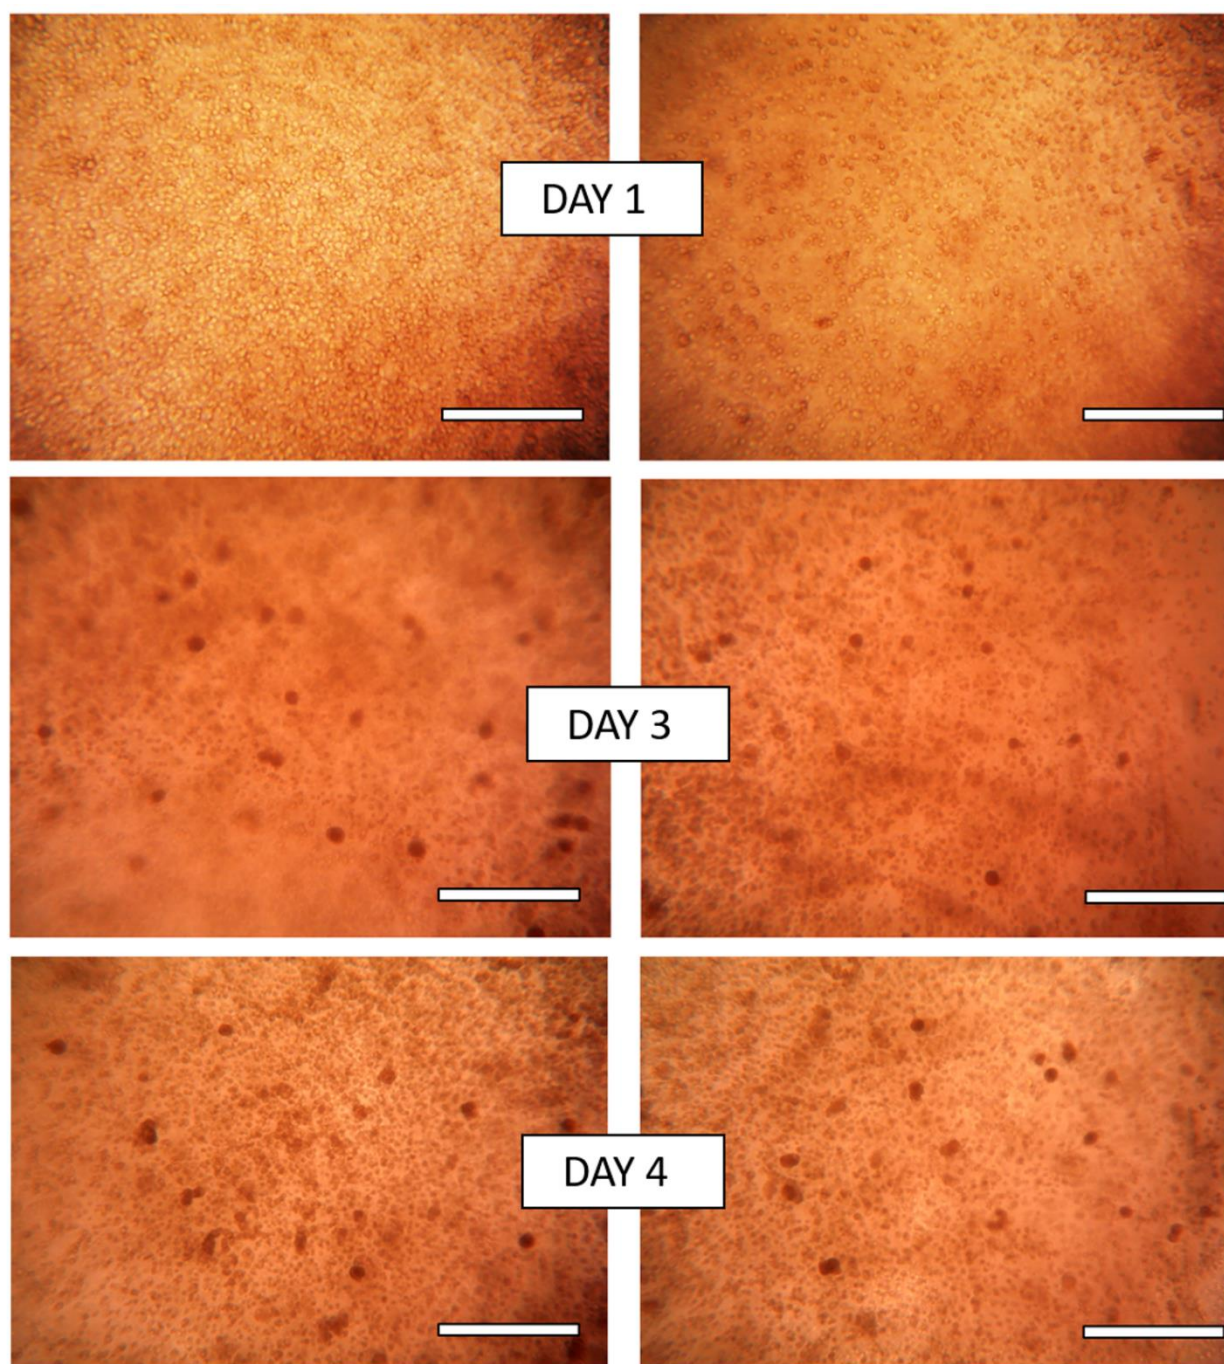

**Figure S8.** Growth of individual HaCaT cells incorporated with 0.75wt% sodium alginate in DMEM media followed by cross-linking with 1 M  $\text{CaCl}_2$ . The HaCaT cells were cultured in the alginate film for 4 days under DMEM media and images were taken from each well. Scale bars are 200  $\mu\text{m}$ . Note that a very small fraction of the individual HaCaT cells develop into spheroids and growth over the course of 4 days.

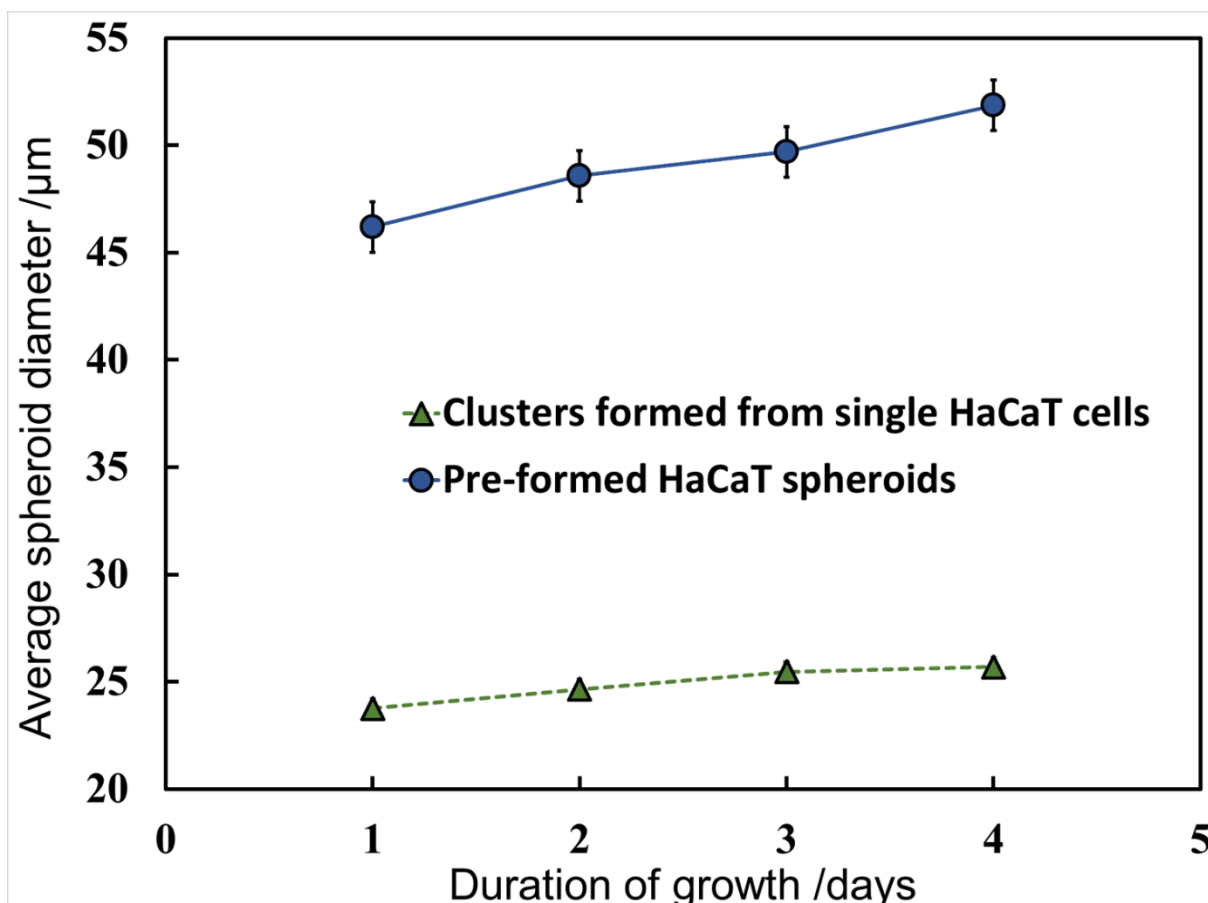

**Figure S9.** Growth curves of spheroids spontaneously formed from individual HaCaT cells (triangle symbols) and pre-formed HaCaT spheroids by our method (circle symbols) both incorporated within a film of 0.75wt% sodium alginate in DMEM media followed by cross-linking with 1 M  $\text{CaCl}_2$ . The HaCaT cells were cultured in the alginate film for 4 days under DMEM media and images were taken from each well. Note that a lower rate of growth of the individual HaCaT cells that develop into spheroids over the course of 4 days – see typical images of the alginate films with the individual cells growth in Figure S7 (The error bars are within the symbol size).
